# Supplementary material for: Tweenager Computer Visual Syndrome Due to Tablets and Laptops during the Postlockdown COVID-19 Pandemic and the Influence on the Binocular and Accommodative System
Source: MDPI journal article supplement (doi:10.3390/jcm11185317), 2022-09-09
Supplement: s1 [file s1]

# Computer Visual Syndrome Survey

Name:

Age:

Sex:

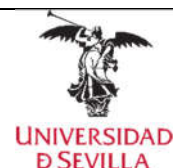

|                                                                                                                                        |                   |                   |                   |
|----------------------------------------------------------------------------------------------------------------------------------------|-------------------|-------------------|-------------------|
| 1. Do you use digital devices to study?                                                                                                |                   |                   |                   |
| Never                                                                                                                                  | Sometimes         | Often             | Always            |
| 2. How many days per week do you play/study with digital screens?                                                                      |                   |                   |                   |
| 1 day or less                                                                                                                          | From 1 to 3 days  | From 4 to 6 days  | All days          |
| 3. How many hours per day do you play/study with digital screens?                                                                      |                   |                   |                   |
| 1 hours or less                                                                                                                        | From 1 to 2 hours | From 3 to 4 hours | More than 5 hours |
| 4. Do you use digital devices with the light off?                                                                                      |                   |                   |                   |
| Never                                                                                                                                  | Sometimes         | Often             | Always            |
| 5. Have you noticed that sometimes you get blurred letters on digital screens while playing/studying with them?                        |                   |                   |                   |
| Never                                                                                                                                  | Sometimes         | Often             | Always            |
| 6. Do you notice your eyes tired during or after using computers or tablets?                                                           |                   |                   |                   |
| Never                                                                                                                                  | Sometimes         | Often             | Always            |
| 7. Have you noticed that your eyes hurt before or after using digital screens?                                                         |                   |                   |                   |
| Never                                                                                                                                  | Sometimes         | Often             | Always            |
| 8. Have you noticed a burning sensation in your eyes during or after using digital screens?                                            |                   |                   |                   |
| Never                                                                                                                                  | Sometimes         | Often             | Always            |
| 9. Have you noticed that, after digital screens you have to strive to be able to see well from afar?                                   |                   |                   |                   |
| Never                                                                                                                                  | Sometimes         | Often             | Always            |
| 10. Have you noticed that, after some time with digital screens, you have difficulty reading?                                          |                   |                   |                   |
| Never                                                                                                                                  | Sometimes         | Often             | Always            |
| 11. While using digital screens, do you have the feeling that you get cross-eyed?                                                      |                   |                   |                   |
| Never                                                                                                                                  | Sometimes         | Often             | Always            |
| 12. Have you noticed that when you spend a lot of time with the computer there comes a time when you end up seeing the double letters? |                   |                   |                   |
| Never                                                                                                                                  | Sometimes         | Often             | Always            |
| 13. Have you noticed that, after some time with the computer, you are bothered by the lights?                                          |                   |                   |                   |
| Never                                                                                                                                  | Sometimes         | Often             | Always            |
| 14. In recent weeks have you noticed watery eyes during or after the use of digital screens?                                           |                   |                   |                   |
| Never                                                                                                                                  | Sometimes         | Often             | Always            |
| 15. In recent weeks have you noticed dry eyes?                                                                                         |                   |                   |                   |
| Never                                                                                                                                  | Sometimes         | Often             | Always            |
| 16. In recent weeks have you noticed red eyes?                                                                                         |                   |                   |                   |
| Never                                                                                                                                  | Sometimes         | Often             | Always            |
| 17. Has your headache after using electronic devices?                                                                                  |                   |                   |                   |
| Never                                                                                                                                  | Sometimes         | Often             | Always            |
| 18. Do you feel head/back/neck pain after using electronic devices?                                                                    |                   |                   |                   |
| Never                                                                                                                                  | Sometimes         | Often             | Always            |
| 19. If you have suffered some of these symptoms, Does it disappear?                                                                    |                   |                   |                   |
| Never                                                                                                                                  | Sometimes         | Often             | Always            |
